# Supplementary material for: Adult-Type Granulosa Cell Tumor of the Testis: A Report of a Case and a Discussion of the Literature
Source: Preprints.org preprint supplement (doi:10.20944/preprints202305.1119.v1), 2023-05-16
Supplement: Supplementary file 1 [file supplementary]

| Author            | Year | Reference | Age (years) | Tumor size (cm) | Side of tumor | Menstratic | Presenting symptoms          | endocrine symptoms | F/U         |
|-------------------|------|-----------|-------------|-----------------|---------------|------------|------------------------------|--------------------|-------------|
| Lambale           | 1952 | [12]      | 35          | 9               | R             |            |                              | Gynecomastia       | 8.5         |
| Cohen             | 1953 | [13]      | 21          | <1              | L             |            | incidental                   | Gynecomastia       | no          |
| Mason-Huerta case | 1955 | [14]      | 53          | 30              | R             |            |                              | Gynecomastia       | no          |
| Melrose           | 1955 | [15]      | 52          | 13              | R             |            |                              |                    | no          |
| Maselli           | 1959 | [16]      | 41          | 10.1            | L             | metastatic |                              | Gynecomastia       | DOD 5 m     |
| Marshall          | 1977 | [17]      | 53          | 30              | no            |            | mass, no pain                | Gynecomastia       | 17y         |
| Talman            | 1983 | [18]      | 44          | 3.50            | R             |            | mass, no pain                |                    | 3 yrs       |
| Gayle             | 1989 | [19]      | 41          | 1.8 cm          | R             |            |                              |                    | no          |
| Dix               | 1990 | [20]      | 63          | 19 cm           | L             |            | mass, no pain                |                    | DOC 1 m     |
| Natal             | 1992 | [21]      | 61          | 3.60            | R             |            |                              |                    | no          |
| Matsuda           | 1992 | [22]      | 26          | 10.50           | L             | indignant  | palpable mass                | gynecomastia       | 14 yrs NED  |
| Suzuki            | 1992 | [23]      | no          | no              | no            |            |                              |                    | no          |
| Morish            | 1992 | [24]      | 42          | no              | L             | indignant  |                              |                    | AWD         |
| Jarama-Quintero   | 1993 | [25]      | 37          | 2.30            | R             |            |                              |                    | 3y DOC      |
| Jarama-Quintero   | 1993 |           | 55          | 3.30            | L             |            |                              |                    | no          |
| Jarama-Quintero   | 1993 |           | 66          | 7.00            | L             | indignant  |                              |                    | DOD 11 yrs  |
| Jarama-Quintero   | 1993 |           | 39          | 4.00            | L             |            |                              |                    | 3 yrs NED   |
| Jarama-Quintero   | 1993 |           | 29          | 7.50            | R             | indignant  |                              |                    |             |
| Jarama-Quintero   | 1993 |           | 76          | 0.70            | L             |            |                              |                    | NED 1 m     |
| Randhan           | 1997 | [26]      | no          | no              | no            |            |                              |                    | no          |
| Randhan           | 1997 |           | no          | no              | no            |            |                              |                    | no          |
| Randhan           | 1997 |           | no          | no              | no            |            |                              |                    | no          |
| Morgan            | 1999 | [28]      | 49          | 2.60            | L             |            |                              |                    | 2 yrs NED   |
| Al-Bayoum         | 2000 | [27]      | 49          | 3.60            | R             |            |                              |                    | 7 m NED     |
| Wang              | 2002 | [29]      | 54          | no              | L             |            | hydroic, asymptomatic        |                    | no          |
| Cauro             | 2004 | [30]      | 33          | 1.80            | L             |            |                              |                    | no          |
| Stappels          | 2005 | [31]      | 51          | no              | L             | indignant  |                              |                    | 6 yrs AWD   |
| Hizawa            | 2006 | [32]      | 39          | 13.00           | L             |            |                              |                    | 4 yrs NED   |
| Arzola            | 2006 | [33]      | 32          | 2.10            | L             |            | palpable mass                |                    |             |
| Lopez             | 2007 | [34]      | 77          | 4.00            | L             |            |                              |                    | no          |
| Dhawan            | 2007 | [35]      | 45          | 6.50            | R             |            | palpable mass                |                    | 2 yrs NED   |
| Capra             | 2008 | [36]      | 12          | 8.00            | L             |            |                              |                    | 1 yr NED    |
| Hannanbach        | 2008 | [38]      | 55          | no              | no            | indignant  |                              |                    | 3 yrs NED   |
| Song              | 2011 | [37]      | 28          | 2.60            | L             |            |                              |                    | no          |
| Hansen            | 2011 | [39]      | 21          | 1.00            | L             |            |                              |                    | 2 yrs NED   |
| Lima              | 2012 | [40]      | 77          | 2.30            | R             |            |                              |                    | no          |
| Lima              | 2012 |           | 22          | 1.80            | L             |            |                              |                    | no          |
| Lima              | 2012 |           | 46          | 2.10            | L             |            |                              |                    | no          |
| Schubert          | 2014 | [41]      | 78          | 1.3             | L             |            | palpable mass                |                    | 23 m NED    |
| Comajo            | 2014 | [42]      | 49          | 3.00            | R             |            |                              |                    | 137 m, DODD |
| Comajo            | 2014 |           | 22          | 3.30            | L             |            |                              |                    | 48 m        |
| Comajo            | 2014 |           | 56          | 0.90            | L             |            |                              |                    | 59 m        |
| Comajo            | 2014 |           | no          | 3.60            | L             |            |                              |                    | last        |
| Comajo            | 2014 |           | 27          | 1.80            | R             |            |                              |                    | 60 m        |
| Comajo            | 2014 |           | 87          | no              | no            |            |                              |                    | 109 m       |
| Comajo            | 2014 |           | 47          | 4.30            | R             |            |                              |                    | last        |
| Comajo            | 2014 |           | 31          | 2.10            | R             |            |                              |                    | 58 m        |
| Comajo            | 2014 |           | 47          | 0.50            | L             |            |                              |                    | last        |
| Comajo            | 2014 |           | 55          | 2.10            | L             |            |                              |                    | 80 m        |
| Comajo            | 2014 |           | 25          | 2.00            | R             |            |                              |                    | last        |
| Comajo            | 2014 |           | 45          | 1.40            | R             |            |                              |                    | last        |
| Comajo            | 2014 |           | 74          | 3.50            | L             |            |                              |                    | 104 m       |
| Comajo            | 2014 |           | 27          | 1.40            | R             |            |                              |                    | 36 m        |
| Comajo            | 2014 |           | 32          | 4.20            | R             |            |                              |                    | last        |
| Comajo            | 2014 |           | 18          | 3.20            | L             |            |                              |                    | last        |
| Comajo            | 2014 |           | 69          | 0.90            | R             |            |                              |                    | last        |
| Comajo            | 2014 |           | 23          | 1.40            | R             |            |                              |                    | 65 m        |
| Comajo            | 2014 |           | 20          | 4.50            | L             |            |                              |                    | 1 m         |
| Comajo            | 2014 |           | 52          | 4.30            | R             | indignant  |                              |                    | 24 m AWD    |
| Comajo            | 2014 |           | 14          | 0.80            | R             |            |                              |                    | last        |
| Comajo            | 2014 |           | 21          | 3.00            | R             |            |                              |                    | 37 m        |
| Comajo            | 2014 |           | 17          | 1.50            | R             |            |                              |                    | last        |
| Comajo            | 2014 |           | 64          | 2.40            | R             |            |                              |                    | 28 m        |
| Comajo            | 2014 |           | 14          | 3.50            | R             |            |                              |                    | 35 m        |
| Comajo            | 2014 |           | 28          | 2.80            | L             |            |                              |                    | last        |
| Comajo            | 2014 |           | 51          | 3.00            | L             |            |                              |                    | last        |
| Comajo            | 2014 |           | 63          | 1.00            | L             |            |                              |                    | 25 m        |
| Comajo            | 2014 |           | 25          | 5.50            | R             |            |                              |                    | 1 m         |
| Comajo            | 2014 |           | 44          | 1.20            | L             |            |                              |                    | 1 m         |
| Comajo            | 2014 |           | 40          | 4.20            | R             |            |                              |                    | 1 m         |
| Rehder            | 2003 | [43]      | 60          | 3.50            | R             |            | 6-month mass                 |                    | 20 m        |
| Mira              | 2008 | [44]      | 25          | 0.50            | L             |            | axillary pain 2 w ede        |                    | no          |
| Kawakuchi         | 2008 | [45]      | 21          | 1.50            | L             |            | incidental                   |                    | 1 yr        |
| Hansen            | 2009 | [46]      | 65          | 5.00            | L             | indignant  |                              |                    | DOD         |
| Milica            | 2013 | [47]      | 37          | 4.20            | L             |            | palpable mass                |                    | 2 yrs       |
| Norman            | 2013 | [48]      | 68          | no              | R             |            |                              |                    | 18 m        |
| Rane              | 2014 | [49]      | 34          | 5.00            | R             |            |                              |                    | 6 m         |
| Rane              | 2014 |           | 46          | 05.00           | L             |            |                              |                    | 2.5 yrs     |
| Rane              | 2014 |           | 46          | 11.00           | R             | indignant  |                              |                    | 3 m         |
| Tanaka            | 2014 | [50]      | 22          | 0.90            | L             |            |                              |                    | no          |
| Takamitsu         | 2014 | [51]      | 29          | 2.20            | R             |            |                              |                    | 1 yr        |
| Orlandini         | 2015 | [52]      | 86          | 6.90            | R             |            | mass, no pain                | gynecomastia       | 1 yr        |
| Vallabhanai       | 2015 | [53]      | 43          | 6.00            | L             |            | palpable mass                |                    | 1 yr        |
| Gomez-Viktoroff   | 2016 | [54]      | 23          | no              | no            |            |                              |                    | no          |
| Mulgrew           | 2016 | [55]      | 37          | 4.7             | L             | indignant  | incidental                   | gynecomastia       | 32 m NED    |
| Al-Akha           | 2016 | [56]      | 48          | 1.20            | L             |            |                              |                    | no          |
| Bhai              | 2016 | [57]      | 20          | 2.00            | R             |            |                              |                    | 4 m NED     |
| Elshaker          | 2017 | [58]      | 40          | 5.50            | L             | indignant  | palpable growing mass        |                    | 2 yrs NED   |
| Mizumoto          | 2017 | [59]      | 74          | 5.00            | R             |            | palpable mass                |                    | no          |
| Milne             | 2017 | [60]      | 39          | 5.30            | no            |            |                              |                    | no          |
| Nunes-Camacho     | 2017 | [61]      | 31          | 4.50            | no            |            |                              |                    | 10 yrs      |
| Dackmann          | 2019 | [62]      | 22          | 0.8             | L             |            | axillary discomfort          |                    | no          |
| Rubira            | 2021 | [63]      | 64          | 1               | L             |            | palpable testicular swelling |                    | no          |
| Present report    | 2022 |           | 30          | 3.8             |               |            | palpable testicular swelling |                    | 10 m        |
